# Supplementary material for: Inhibition of the insulin-like growth factor-1 receptor potentiates acute effects of castration in a rat model for prostate cancer growth in bone
Source: Springer Nature journal article supplement (doi:10.1007/s10585-017-9848-8), 2017-04-01
Supplement: MOESM3 [file 12249686]

**Supplementary Table 1** Clinical characteristics of patients analyzed for IGF1R immunohistochemistry in bone metastases obtained at surgery for metastatic spinal cord compression

|                                                       | <b>Non-treated<br/>n = 14</b> | <b>Castration-resistant<sup>a</sup><br/>n = 47</b> |
|-------------------------------------------------------|-------------------------------|----------------------------------------------------|
| <b>Age at diagnosis</b><br>(yrs)                      | 74 (64-81)                    | 69 (62-74)                                         |
| <b>Age at metastasis surgery</b><br>(yrs)             | 74 (64-81)                    | 72 (67-79)                                         |
| <b>Serum PSA at diagnosis</b><br>(ng/ml)              | 580 (110-1900)                | 91 (42-560)                                        |
| <b>Serum PSA at metastasis surgery</b><br>(ng/ml)     | 580 (110-1900)                | 340 (93-840)                                       |
| <b>Gleason score at diagnosis</b>                     |                               |                                                    |
| <b>6</b>                                              | 1 (7)                         | 3 (6.4)                                            |
| <b>7</b>                                              | 3 (21)                        | 20 (43)                                            |
| <b>8-10</b>                                           | 2 (14)                        | 15 (32)                                            |
| <b>Not available</b>                                  | 8 (57)                        | 9 (19)                                             |
| <b>Bicalutamide prior to surgery</b>                  |                               |                                                    |
| Yes                                                   | -                             | 28 (60)                                            |
| No                                                    |                               | 19 (40)                                            |
| <b>Chemotherapy prior to surgery<sup>c</sup></b>      |                               |                                                    |
| Yes                                                   | -                             | 8 (17)                                             |
| No                                                    |                               | 39 (83)                                            |
| <b>Radiation prior to surgery<sup>d</sup></b>         |                               |                                                    |
| Yes                                                   | -                             | 8 (17)                                             |
| No                                                    |                               | 39 (83)                                            |
| <b>Bisphosphonate prior to surgery<sup>e</sup></b>    |                               |                                                    |
| Yes                                                   | -                             | 6 (13)                                             |
| No                                                    |                               | 41 (87)                                            |
| <b>Ra-223 prior to surgery</b>                        |                               |                                                    |
| Yes                                                   | -                             | 5 (11)                                             |
| No                                                    |                               | 42 (89)                                            |
| <b>Follow up after metastasis surgery</b><br>(months) | 31 (22-69)                    | 5.7 (2.0-13)                                       |

Continuous values are given as median (25<sup>th</sup>-75<sup>th</sup> percentiles) and categorical values are given as numbers (percentages).

<sup>a</sup>Castration-resistant patients had disease progression after long-term androgen deprivation therapy including surgical ablation, LHRH/GNRH agonist therapy, and therapy with anti-androgens (bicalutamide).

<sup>c</sup>Chemotherapy included taxotere in 6 cases, estramustine in 1 case, and taxotere, carboplatin and etoposide in 1 case.

<sup>d</sup>Radiation towards operation site.
